# Supplementary material for: Exploring freshwater soundscapes of tropical marshland habitats in Southeast Asia: insights into auditory sensory adaptation of wild Siamese fighting fish Betta splendens
Source: PeerJ. 2025 Jan 13;13:e18491. doi: 10.7717/peerj.18491 (PMC11737339; doi:10.7717/peerj.18491)
Supplement: Supplemental Information 1 — Auditory thresholds of 5 males and 6 females B. splendens. Data presented is based on 8 months old fish, consisting of similar sized individuals. [file peerj-13-18491-s001.xlsx]

## Sheet: Sheet1
gender	Freq_100	Freq_200	Freq_400	Freq_600	Freq_800	Freq_1000	Freq_2000	Freq_4000	Freq_6000
F	85	105	92.5	100	102.5	105	120	140	135
F	85	75	82.5	100	110	115	125	140	135
F	85	80	95	105	102.5	107.5	125
F	90	75	100	112.5	112.5	115	130	135	135
F	80	95	82.5	115	105	112.5	120	140	140
F	85	100	100	112.5	110	110	115
M	95	90	85	105	100	110	125	140	135
M	80	85	80	92.5	112.5	105	130	140	140
M	85	85	80	92.5	90	102.5	125	140	120
M	85	80	80	92.5	102.5	100	125	135	135
M	75	85	80	92.5	100	112.5	120	130	125
